# Supplementary material for: Natural Selection Affects Multiple Aspects of Genetic Variation at Putatively Neutral Sites across the Human Genome
Source: PLOS journal article supplement (doi:10.1371/journal.pgen.1002326), 2011-10-13
Supplement: S12 (10.1371/journal.pgen.1002326.s012) [file journal.pgen.1002326.s012]

Table S2: Pairwise correlations between variables for the higher-coverage data.

|               | Rec. rate | Genic content <sup>a</sup> | GC content <sup>b</sup> | Coverage <sup>c</sup> | $d^d$   | # SNPs <sup>e</sup> | $S_{norm}^f$ | $\pi_{norm}^g$ | Average MAF | Tajima's $D$ |
|---------------|-----------|----------------------------|-------------------------|-----------------------|---------|---------------------|--------------|----------------|-------------|--------------|
| Rec. rate     |           | -0.0695                    | 0.3808                  | 0.3590                | 0.2486  | 0.3094              | 0.2093       | 0.2141         | 0.0865      | 0.0704       |
| Genic content | 4.0E-22   |                            | 0.1533                  | 0.2653                | -0.3101 | -0.1683             | -0.0330      | -0.0442        | -0.0435     | -0.0451      |
| GC content    | 0.0       | 6.9E-102                   |                         | 0.4475                | -0.0333 | 0.1296              | 0.1451       | 0.1468         | 0.0460      | 0.0372       |
| Coverage      | 0.0       | 2.5E-308                   | 0.0                     |                       | -0.0388 | 0.0950              | 0.1260       | 0.1291         | 0.0507      | 0.0350       |
| Divergence    | 6.1E-270  | 0.0                        | 3.8E-06                 | 7.0E-08               |         | 0.3982              | -0.0618      | -0.0309        | 0.0684      | 0.0677       |
| # SNPs        | 0.0       | 1.1E-122                   | 4.0E-73                 | 5.6E-40               | 0.0     |                     | 0.8619       | 0.8146         | 0.1631      | 0.1634       |
| $S_{norm}$    | 4.1E-190  | 4.6E-06                    | 2.4E-91                 | 3.4E-69               | 7.9E-18 | 0.0                 |              | 0.9267         | 0.1451      | 0.1459       |
| $\pi_{norm}$  | 3.9E-199  | 8.2E-10                    | 1.7E-93                 | 1.7E-72               | 1.8E-05 | 0.0                 | 0.0          |                | 0.4617      | 0.4693       |
| Average MAF   | 2.3E-33   | 1.5E-09                    | 1.6E-10                 | 1.8E-12               | 1.9E-21 | 3.3E-115            | 2.1E-91      | 0.0            |             | 0.9809       |
| Tajima's $D$  | 1.2E-22   | 3.6E-10                    | 2.4E-07                 | 1.2E-06               | 4.9E-21 | 1.1E-115            | 2.1E-92      | 0.0            | 0.0         |              |

Values of Spearman's  $\rho$  for each pair of variables are shown above the diagonal.  $P$ -values are shown below the diagonal.

<sup>a</sup>. The fraction of each 100 kb window that overlapped with a RefSeq transcript.

<sup>b</sup>. Denotes the number of hg18-pantro2 alignable bases that were not Repeat Masked and did not fall in phastCons regions that were G or C in hg18 divided by the total number of alignable bases within the window that were not Repeat Masked and did not fall in phastCons regions.

<sup>c</sup>. The number of bases per window that were alignable between hg18 and pantro2, were not Repeat Masked, did not fall in phastCons regions, where all six individuals had sequencing data.

<sup>d</sup>. Denotes the number of hg18-pantro2 differences that were not Repeat Masked and did not fall in phastCons regions divided by the total number of positions within the window where differences could have been called (*i.e.* the total number of alignable bases that were not Repeat Masked and did not fall in phastCons regions).

<sup>e</sup>. Denotes the number of SNPs per window divided by the total number of bases where SNPs could have been called (*i.e.* the total number of alignable bases within the window that were not Repeat Masked and did not fall in phastCons regions where all six individuals had sequencing data).

<sup>f</sup>. Denotes the “# SNPs” divided by  $d$ .

<sup>g</sup>. Denotes the average number of pairwise differences between sequences within a window divided by  $d$ .
