# Supplementary material for: Natural Selection Affects Multiple Aspects of Genetic Variation at Putatively Neutral Sites across the Human Genome
Source: PLOS journal article supplement (doi:10.1371/journal.pgen.1002326), 2011-10-13
Supplement: S16 (10.1371/journal.pgen.1002326.s016) [file journal.pgen.1002326.s016]

Table S6: Selection models used in forward simulations.

| Model | Type of selection                   | In Figure 2?     | Neg. noncoding $s^a$ | % intronic sites selected | Strength of positive selection ( $s$ ) <sup>b</sup> | % coding sites positively selected | % windows positively selected ( $p^+$ ) <sup>c</sup> | % windows with negatively selected introns ( $p^-$ ) <sup>d</sup> |
|-------|-------------------------------------|------------------|----------------------|---------------------------|-----------------------------------------------------|------------------------------------|------------------------------------------------------|-------------------------------------------------------------------|
| 1     | Neutral                             | Neutral          | 0                    | 0%                        | 0                                                   | 0%                                 | 0%                                                   | 0%                                                                |
| 2     | Neg. coding only                    | Neg. coding only | 0                    | 0%                        | 0                                                   | 0%                                 | 0%                                                   | 0%                                                                |
| 3     | Pos. coding only <sup>e</sup>       | No               | 0                    | 0%                        | $3.00 \times 10^{-3}$                               | 0.50%                              | 100%                                                 | 0%                                                                |
| 4     | Pos. coding only <sup>e</sup>       | No               | 0                    | 0%                        | $6.25 \times 10^{-3}$                               | 0.50%                              | 100%                                                 | 0%                                                                |
| 5     | Neg & pos. coding                   | No               | 0                    | 0%                        | $3.00 \times 10^{-3}$                               | 0.50%                              | 100%                                                 | 0%                                                                |
| 6     | Neg & pos. coding                   | First Orange     | 0                    | 0%                        | $6.25 \times 10^{-3}$                               | 0.10%                              | 100%                                                 | 0%                                                                |
| 7     | Neg & pos. coding                   | Second Orange    | 0                    | 0%                        | $6.25 \times 10^{-3}$                               | 0.50%                              | 100%                                                 | 0%                                                                |
| 8     | Neg. & pos. coding & neg. noncoding | No               | $7.5 \times 10^{-5}$ | 25%                       | $6.25 \times 10^{-3}$                               | 0.10%                              | 100%                                                 | 100%                                                              |
| 9     | Neg & pos. coding & neg. noncoding  | First Green      | $7.5 \times 10^{-5}$ | 25%                       | $6.25 \times 10^{-3}$                               | 0.50%                              | 100%                                                 | 100%                                                              |

| Model | Type of selection                               | In Figure 2? | Neg. noncoding $s^a$  | % intronic sites selected | Stength of positive selection ( $s$ ) <sup>b</sup> | % coding sites positively selected | % windows positively selected ( $p^+$ ) <sup>c</sup> | % windows with negatively selected introns ( $p^-$ ) <sup>d</sup> |
|-------|-------------------------------------------------|--------------|-----------------------|---------------------------|----------------------------------------------------|------------------------------------|------------------------------------------------------|-------------------------------------------------------------------|
| 10    | Neg & pos. coding & neg. noncoding <sup>f</sup> | Second Green | $7.5 \times 10^{-5}$  | 25%                       | $3.00 \times 10^{-3}$                              | 0.50%                              | 10%                                                  | 90%                                                               |
| 11    | Neg & pos. coding & neg. noncoding <sup>g</sup> | No           | 0                     | 0%                        | $3.00 \times 10^{-3}$                              | 0.50%                              | 10%                                                  | 0%                                                                |
| 12    | Neg & pos. coding & neg. noncoding <sup>h</sup> | No           | $7.5 \times 10^{-5}$  | 50%                       | $3.00 \times 10^{-3}$                              | 0.50%                              | 10%                                                  | 90%                                                               |
| 13    | Neg & pos. coding & neg. noncoding <sup>i</sup> | No           | 0                     | 0%                        | $6.25 \times 10^{-3}$                              | 0.50%                              | 5%                                                   | 0%                                                                |
| 14    | Neg & pos. coding & neg. noncoding <sup>j</sup> | No           | $7.5 \times 10^{-5}$  | 50%                       | $6.25 \times 10^{-3}$                              | 0.50%                              | 5% <sup>f</sup>                                      | 95%                                                               |
| 15    | Neg. coding & noncoding                         | First blue   | $7.5 \times 10^{-5}$  | 25%                       | 0                                                  | 0%                                 | 0%                                                   | 100%                                                              |
| 16    | Neg. coding & noncoding                         | No           | $1.5 \times 10^{-4}$  | 25%                       | 0                                                  | 0%                                 | 0%                                                   | 100%                                                              |
| 17    | Neg. coding & noncoding                         | No           | $2.5 \times 10^{-4}$  | 25%                       | 0                                                  | 0%                                 | 0%                                                   | 100%                                                              |
| 18    | Neg. coding & noncoding                         | No           | $3.75 \times 10^{-4}$ | 25%                       | 0                                                  | 0%                                 | 0%                                                   | 100%                                                              |

| Model | Type of selection                                                | In Figure 2? | Neg. noncoding $s^a$  | % intronic sites selected | Stength of positive selection ( $s$ ) <sup>b</sup> | % coding sites positively selected | % windows positively selected ( $p^+$ ) <sup>c</sup> | % windows with negatively selected introns ( $p^-$ ) <sup>d</sup> |
|-------|------------------------------------------------------------------|--------------|-----------------------|---------------------------|----------------------------------------------------|------------------------------------|------------------------------------------------------|-------------------------------------------------------------------|
| 19    | Neg. coding & noncoding                                          | No           | $1.00 \times 10^{-3}$ | 25%                       | 0                                                  | 0%                                 | 0%                                                   | 100%                                                              |
| 20    | Neg. coding & noncoding                                          | No           | $5.00 \times 10^{-3}$ | 25%                       | 0                                                  | 0%                                 | 0%                                                   | 100%                                                              |
| 21    | Neg. coding & noncoding                                          | No           | $7.5 \times 10^{-5}$  | 40%                       | 0                                                  | 0%                                 | 0%                                                   | 100%                                                              |
| 22    | Neg. coding & noncoding                                          | Second blue  | $7.5 \times 10^{-5}$  | 50%                       | 0                                                  | 0%                                 | 0%                                                   | 100%                                                              |
| 23    | Neg. coding & noncoding                                          | No           | $7.5 \times 10^{-5}$  | 75%                       | 0                                                  | 0%                                 | 0%                                                   | 100%                                                              |
| 24    | Neg. coding & noncoding <sup>k</sup>                             | No           | $7.5 \times 10^{-5}$  | 5%                        | 0                                                  | 0%                                 | 0%                                                   | 100%                                                              |
| 25    | Neutral with biased gene conversion <sup>l</sup>                 | No           | 0                     | 0%                        | 0                                                  | 0%                                 | 0%                                                   | 0%                                                                |
| 26    | Neg. coding & noncoding with biased gene conversion <sup>l</sup> | No           | $7.5 \times 10^{-5}$  | 25%                       | 0                                                  | 0%                                 | 0%                                                   | 100%                                                              |

<sup>a</sup>. Strength of negative selection (e.g. selection coefficient) for intronic sites.

- <sup>b</sup>. Mean strength of positive selection (e.g. selection coefficient) for the coding sites that were positively selected. Selection coefficients for each positively selected nonsynonymous mutations were drawn from a gamma (shape=(mean\*rate), rate=400000) distribution.
- <sup>c</sup>. The fraction of the simulated windows where positively selected mutations were allowed to occur on the specified proportion of nonsynonymous mutations. Remaining windows did not include any positive selection.
- <sup>d</sup>. The fraction of the windows where negative selection occurred on the specified proportion intronic mutations. Introns evolved neutrally in the remaining windows.
- <sup>e</sup>. 0.5% of nonsynonymous mutations were positively selected and the remainder were neutral.
- <sup>f</sup>. In 10% of the windows, 0.5% of nonsynonymous mutations were positively selected, and the remainder were negatively selected. In these windows, intronic mutations were neutral. In the remaining 90% of the windows, there was no positive selection, but 25% of intronic mutations were negatively selected.
- <sup>g</sup>. In 10% of the windows, 0.5% of nonsynonymous mutations were positively selected, and the remainder were neutral. In these windows, intronic mutations were neutral. In the remaining 90% of the windows, all mutations were neutral.
- <sup>h</sup>. In 10% of the windows, 0.5% of nonsynonymous mutations were positively selected, and the remainder were neutral. In these windows, intronic mutations were neutral. In the remaining 90% of the windows, there was no positive selection, but 50% of intronic mutations and all nonsynonymous mutations were negatively selected (where the selection coefficients for the nonsynonymous mutations were drawn from a gamma distribution).
- <sup>i</sup>. In 5% of the windows, 0.5% of nonsynonymous mutations were positively selected, and the remainder were neutral. In these windows, intronic mutations were neutral. In the remaining 95% of the windows, all mutations were neutral.
- <sup>j</sup>. In 5% of the windows, 0.5% of nonsynonymous mutations were positively selected, and the remainder were neutral. In these windows, intronic mutations were neutral. In the remaining 95% of the windows, there was no positive selection, but 50% of intronic mutations and all nonsynonymous mutations were negatively selected (where the selection coefficients for the nonsynonymous mutations were drawn from a gamma distribution).

<sup>k</sup>. In this model we simulated a 348 kb window (instead of a 100 kb window) with 40 exons (each of size 250 bp) and 38 introns (each of size 7500 bp) with a 53 kb neutral fragment in the center. These simulations show the effect of window size on the correlations between genetic variation and recombination rates.

<sup>l</sup>. This model included biased gene conversion. Here, 1/8 of double-strand breaks resulted in recombination events, while 7/8 were gene conversion events. 51% of the heterozygous AT/GC sites were converted to GC homozygotes. Note, the overall recombination rate for each sequence was increased 8-fold to keep the total number of recombination events the same as in previous simulations. The gene conversion tract length was 500 bp.
